# Supplementary material for: Model predicted human mobility explains COVID-19 transmission in urban space without behavioral data
Source: Springer Nature journal article supplement (doi:10.1038/s41598-025-87363-3), 2025-02-21
Supplement: MOESM1 [file 41598_2025_87363_MOESM1_ESM.pdf › 41598_2025_87363_MOESM1_ESM.pdf]

# Supplementary Information of model predicted human mobility explains COVID-19 transmission in urban space without behavioral data

Zhenyu Han, Fengli Xu, Yong Li, Tao Jiang, James Evans

Yong Li and James Evans are corresponding authors. E-mail: liyong07tsinghua.edu.cn, jevansuchicago.edu

## Datasets

In this work, we use five datasets: population distribution data and COVID-19 confirmed cases data are for model fitting. Besides, policy announcement data, real-world mobility data and neighborhood level infection data for validation.

**A) Population distribution data:** we derive the population distribution data from the WorldPop project<sup>1</sup>. It contains fine-grained population distribution at 100m resolution for cities around the globe. We choose the 2020 dataset of the United States, India and Brazil in our research, and aggregate the population into neighborhoods for each urban county. We determine the border of each county or city based on Google Maps.

**B) COVID-19 confirmed cases data:** for U.S. counties, we adopt the COVID-19 confirmed cases time-series data released by Johns Hopkins University<sup>2</sup>. According to the severity of infection, we select 20 counties in U.S. to validate our model. Most of them are from the top 20 infected counties, and we also include three countries that have less infected people to validate model effectiveness on mild scenarios, which are Davidson, Will and Hillsborough. Statistics of the selected counties are available in Table 1. For India and Brazil cities, we adopt the official release of confirmed cases data<sup>3,4</sup> to fit the model. We select the 5 most infectious cities in India and Brazil accordingly, which are shown in Table 2, Table 3.

**C) Policy announcement data:** we refer to the COVID-19 State and County Policy Orders dataset<sup>5</sup> at the state and county level to determine the date of behavior change in the U.S. (Fig. 1). We calculate the density of COVID-19 related policies and adopt this index as indicative of political attitude towards the disease. The selected time point for behavior change in early periods is April 1st, when the number of policies reached a peak (and a few days earlier). Specific policies have good correspondence with that date. For example on March 21, New Jersey Governor announced a “stay-at-home” order and on March 22nd, non-essential businesses were ordered to close or end all in-person functions in New York, New Jersey and Connecticut<sup>6</sup>.

**D) Real-world mobility data:** we use Apple Mobility Trends Reports<sup>7</sup> as the real-world mobility data to validate our model-estimated mobility behavior changes.

**E) Neighborhood level infection data:** we use fine-grained infection data from New York City to validate the location-aware reopening policy design proposed by our model. These infection data are available at MODZCTA level, which divides New York City into 177 neighborhoods. These data are provided by the Health Department of New York City<sup>8</sup>, which are hosted in the NYC Coronavirus Disease 2019 (COVID-19) Data Repository<sup>9</sup>.

## Supplementary Methods

### SM1. Calibration of mobility activity

After the model calibration process on epidemic curves, the calibrated mobility level  $M$  can be used to estimate the mobility change without empirical mobility data. To evaluate the accuracy of this estimation, we collect Apple Mobility Trends Reports as an external data source. However, as described in the Methods section, parameter  $M$  is a dimensionless scaling factor, which forbids direct comparisons. Here, we rescale the changes of parameter  $\Delta M$  according to a linear mapping function as follows:

$$\Delta \bar{M} = k \times \Delta M + b,$$

where  $\Delta \bar{M}$  and  $\Delta M$  are the rescaled and original model-informed mobility changes accordingly. In Figure 1C, we investigate the correlation between model-informed mobility change ( $\Delta \bar{M}$ ) with the empirical mobility change (Apple data), where the high Pearson correlation of 0.872 validates that the proposed model can accurately estimate empirical mobility behavior changes without mobility data.

## Supplementary Figures

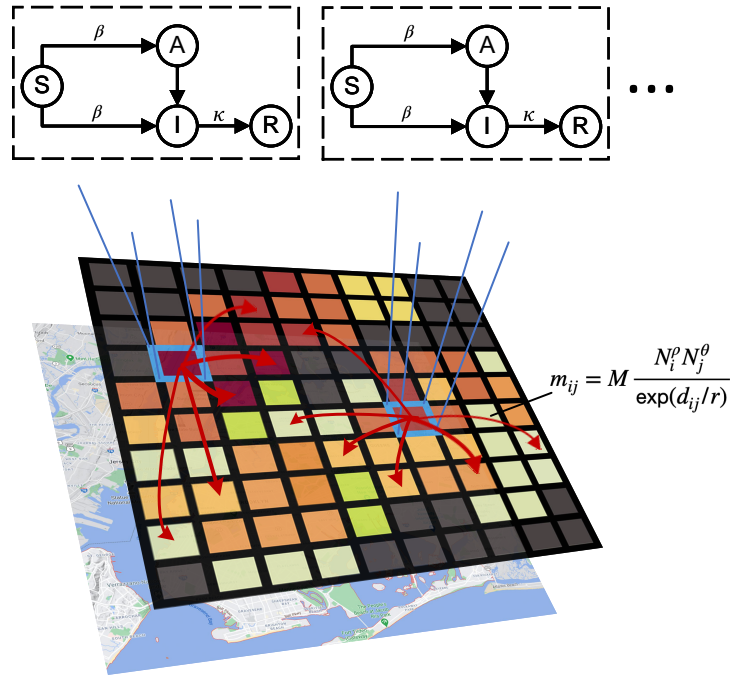

**Supplementary Figure 1. Illustration of the proposed metapopulation model.** We segment urban space into numerous neighborhoods, and divide the whole city population into subpopulations based on them. Separate SIR variant are run on the subpopulation within each neighborhood, and the susceptible, asymptomatic, infected, and recovered individuals are mixed across neighborhoods according to their mobility predicted by the gravity model.

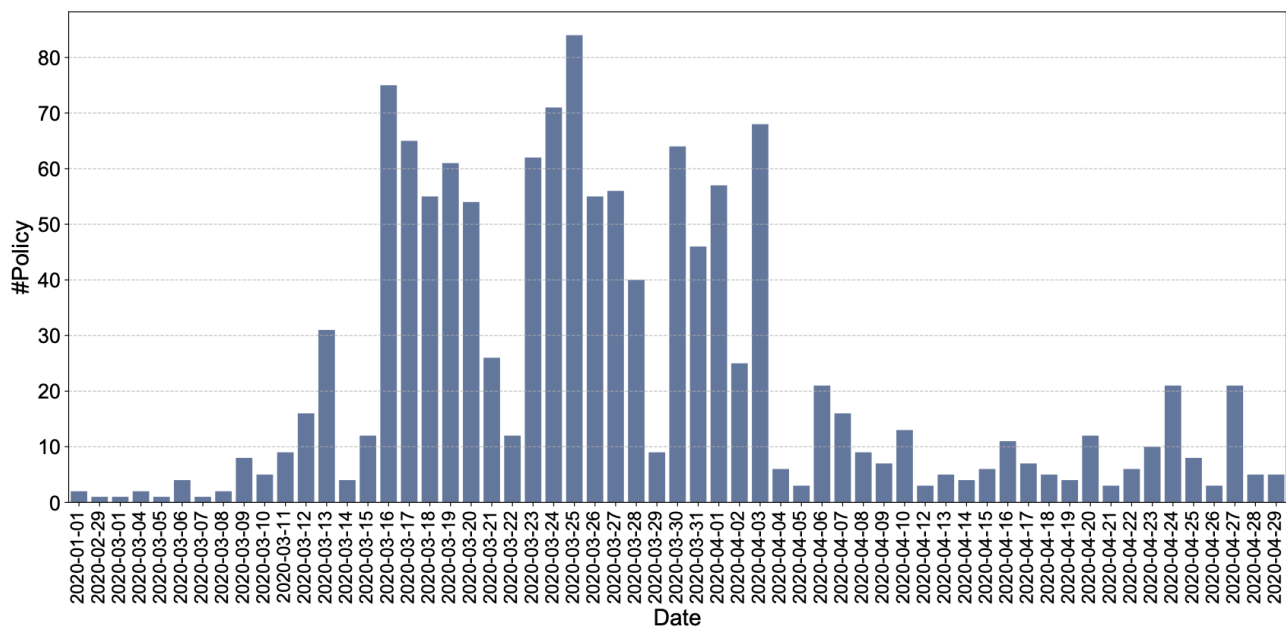

**Supplementary Figure 2. The number of COVID-19 intervention policies announced in the United States.** Most policies are released at the end of March after the Declaration of National Emergency. Thus, we choose April 1st as the time point of behavior change in the United States.

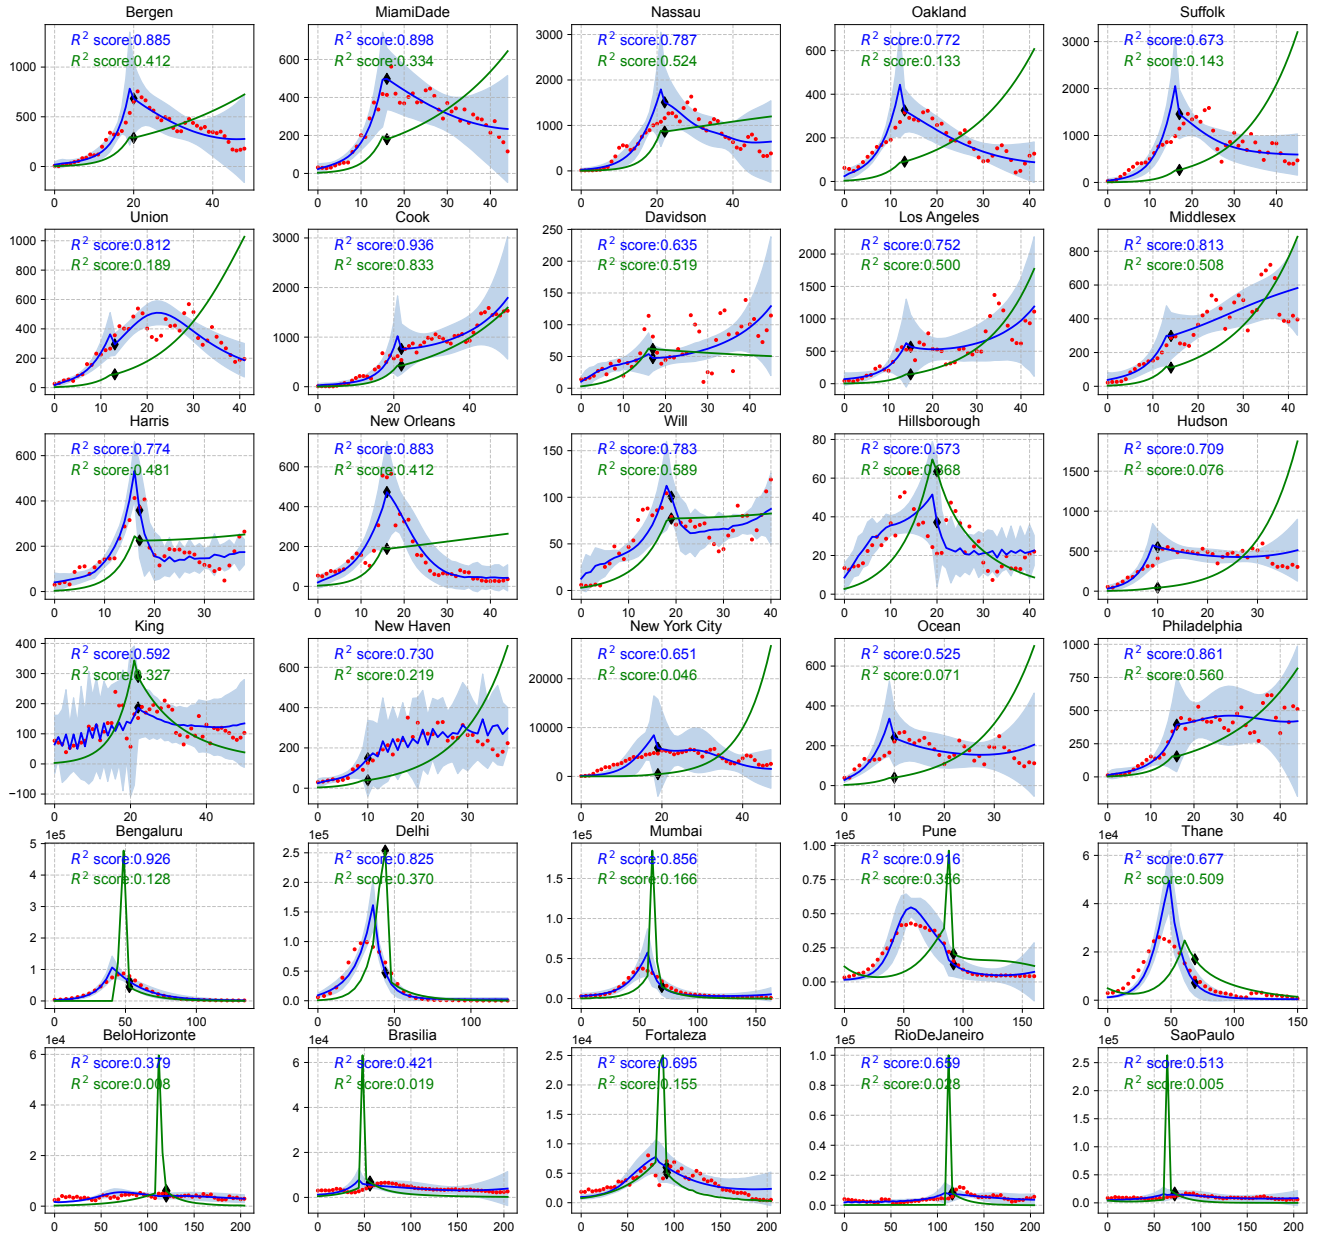

**Supplementary Figure 3. Daily case counts of our model and traditional SEIR, calibrated on cumulative cases.** In the main text, we demonstrate the cumulative cases curves to better demonstrate the ability of our model to capture different epidemic dynamics. Here we provide the corresponding daily case counts to better demonstrate the robustness of our model. The daily cases is processed by a 3-point moving average.

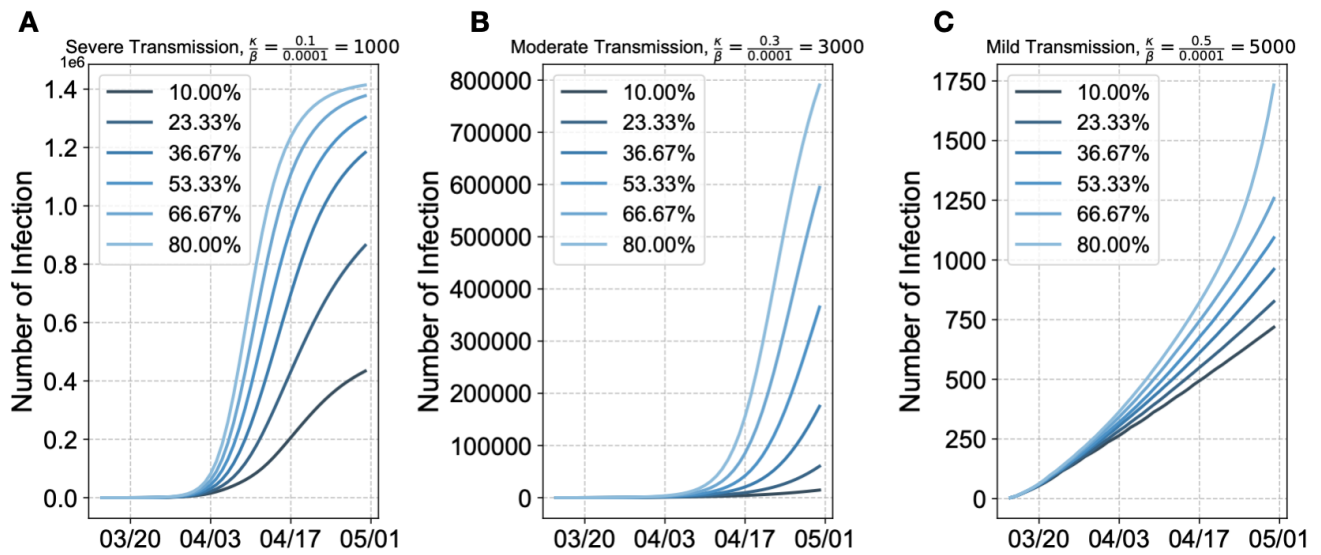

**Supplementary Figure 4. Estimated growth curves of COVID-19 cases with different mobility levels and transmission rates.** Color of lines represent different mobility levels compared with maximum mobility, where all people will move to other neighborhoods. Different mobility levels will greatly change the shape of growth curves, where low mobility levels are more likely to result in sub-exponential growth curves.

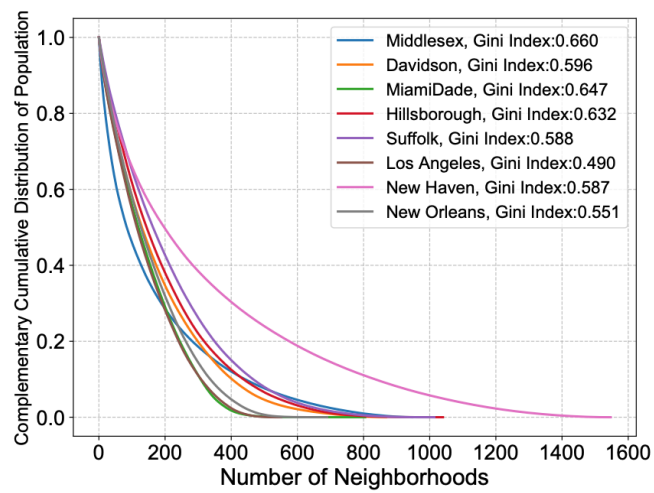

**Supplementary Figure 5. Heterogeneity of population distribution in cities.** Population distributions of selected U.S. counties demonstrate strong heterogeneity where top populated neighborhoods account for considerable population.

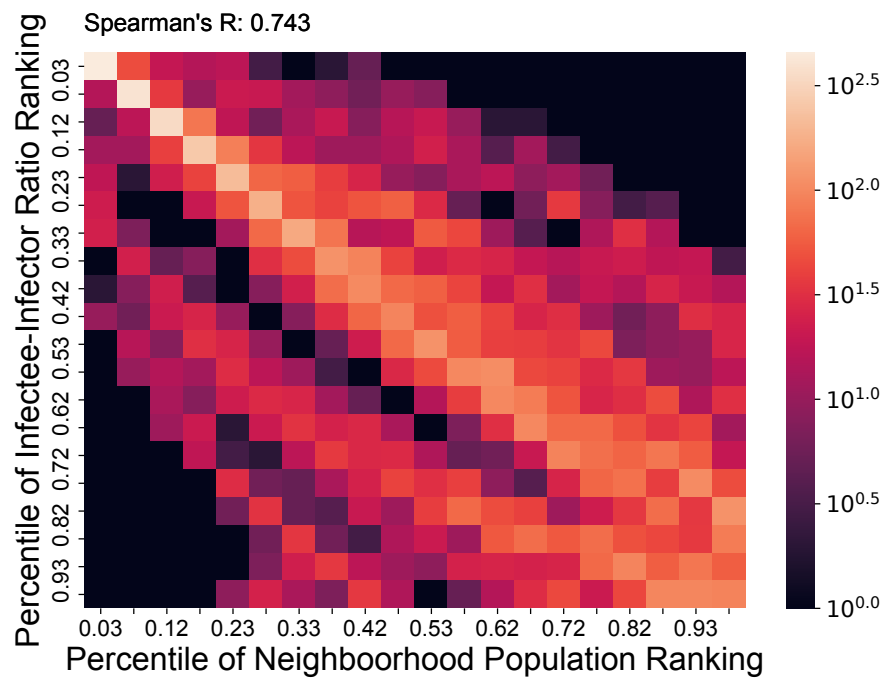

**Supplementary Figure 6. Correlation between disease transmission and population.** The heatmap of neighborhood's ranking on population size and infectee-infectior ratio across 20 United States counties, which manifests a relative high Spearman correlation of 0.743, but also a high variance in infectee-infectior ratio that cannot be explained by population size.

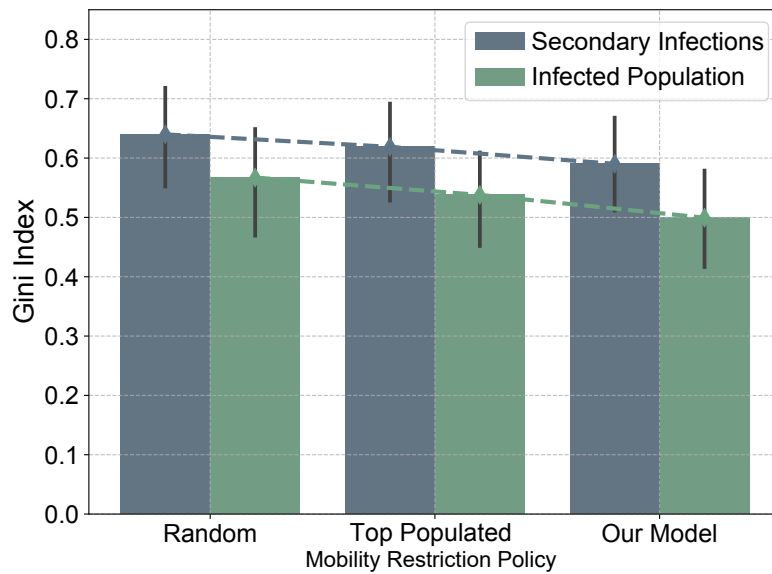

**Supplementary Figure 7. The effect of superspreading events under different mobility reduction policies in U.S. urban counties.** It is measured by the Gini indices of the spatial distribution of secondary infections and the infected population. The policy informed by our model results in smaller spatial unevenness of infection risk, which indicates less superspreading.



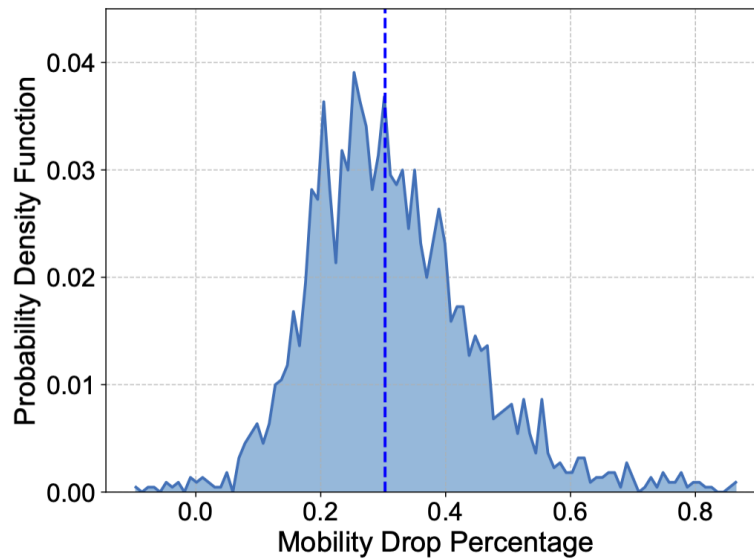

**Supplementary Figure 8. Mobility drops in selected U.S. urban counties before and after March 25.** We evaluate the real-world mobility drops from Apple Mobility Trends Reports<sup>7</sup>. The mobility drop has a median value of 30.3% (shown in the vertical dashed line), with IQR  $0.227 \sim 0.392$ .

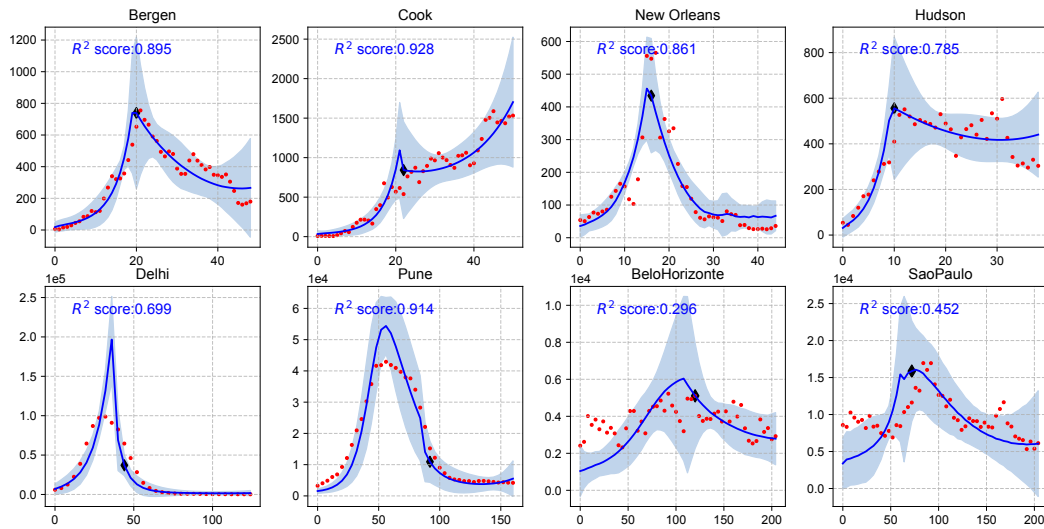

**Supplementary Figure 9. Daily case counts of our model and traditional SEIR, calibrated on daily cases.** We choose representative counties and cities that cover different epidemic dynamics and population densities to present the differences between calibrated on cumulative cases and daily cases. The daily cases is processed by a 3-point moving average.

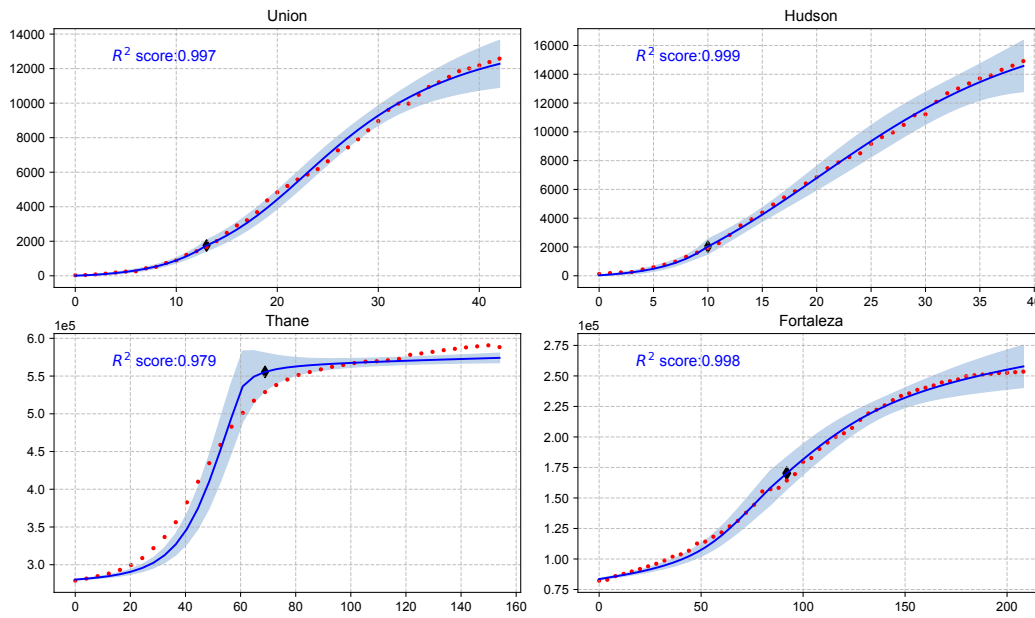

**Supplementary Figure 10. Performance of using radiation model in reproducing COVID-19 growth curves.** We replace the gravity model by the radiation model in Union, Hudson, Thane and Fortaleza to validate the robustness of our model. Compared with the results using the gravity model (see Fig.1a), the performance differences are negligible. The gravity based model achieved high  $R^2$  of 0.998 in Union and Hudson, 0.985 in Thane, and 0.994 in Fortaleza. While the radiation based model achieved 0.997 in Union, 0.999 in Hudson, 0.979 in Thane, and 0.998 in Fortaleza.

## Supplementary Tables

**Supplementary Table 1.** Statistics for selected urban U.S. counties

| County       | State         | Time Period            | Behaviour Change | Confirmed Cases | Land Area ( $km^2$ ) | Population |
|--------------|---------------|------------------------|------------------|-----------------|----------------------|------------|
| New York     | New York      | 2020-03-13 ~2020-04-30 | 2020-04-02       | 167478          | 783.8                | 8645904    |
| Cook         | Illinois      | 2020-03-10 ~2020-04-30 | 2020-04-02       | 36513           | 4235                 | 6880976    |
| Nassau       | New York      | 2020-03-10 ~2020-04-30 | 2020-04-02       | 35854           | 1173                 | 1627850    |
| Suffolk      | New York      | 2020-03-15 ~2020-04-30 | 2020-04-02       | 33664           | 6146                 | 1691197    |
| Los Angeles  | California    | 2020-03-17 ~2020-04-30 | 2020-04-02       | 23220           | 1302                 | 5941621    |
| Bergen       | New Jersey    | 2020-03-12 ~2020-04-30 | 2020-04-02       | 15610           | 639                  | 2199635    |
| Hudson       | New Jersey    | 2020-03-22 ~2020-04-30 | 2020-04-02       | 14916           | 162                  | 707938     |
| Philadelphia | Pennsylvania  | 2020-03-16 ~2020-04-30 | 2020-04-02       | 14468           | 400                  | 2158260    |
| Middlesex    | Massachusetts | 2020-03-18 ~2020-04-30 | 2020-04-02       | 14208           | 2195                 | 3249380    |
| Union        | New Jersey    | 2020-03-19 ~2020-04-30 | 2020-04-02       | 12578           | 940                  | 116520     |
| Miami-Dade   | Florida       | 2020-03-16 ~2020-04-30 | 2020-04-02       | 12063           | 6297                 | 2788473    |
| New Haven    | Connecticut   | 2020-03-22 ~2020-04-30 | 2020-04-02       | 7536            | 2233                 | 1160721    |
| Oakland      | Michigan      | 2020-03-19 ~2020-04-30 | 2020-04-02       | 7267            | 2349                 | 1212662    |
| New Orleans  | Louisiana     | 2020-03-16 ~2020-04-30 | 2020-04-02       | 6452            | 906                  | 354576     |
| Ocean        | New Jersey    | 2020-03-22 ~2020-04-30 | 2020-04-02       | 6375            | 2370                 | 584915     |
| Harris       | Texas         | 2020-03-22 ~2020-04-30 | 2020-04-09       | 6356            | 4602                 | 6099809    |
| King         | Washington    | 2020-03-10 ~2020-04-30 | 2020-04-02       | 6207            | 5975                 | 2362968    |
| Davidson     | Tennessee     | 2020-03-15 ~2020-04-30 | 2020-04-02       | 2612            | 1363                 | 931460     |
| Will         | Illinois      | 2020-03-20 ~2020-04-30 | 2020-04-09       | 2492            | 2200                 | 1927804    |
| Hillsborough | Florida       | 2020-03-19 ~2020-04-30 | 2020-04-09       | 1124            | 3279                 | 1628413    |

**Supplementary Table 2.** Statistics for selected cities in India.

| County          | Time Period            | Behaviour Change | Confirmed Cases | Land Area ( $km^2$ ) | Population |
|-----------------|------------------------|------------------|-----------------|----------------------|------------|
| Delhi           | 2021-03-22 ~2021-07-31 | 2021-05-04       | 1436265         | 1484                 | 23764826   |
| Bengaluru Urban | 2021-03-12 ~2021-07-31 | 2021-05-01       | 1227339         | 2196                 | 14196185   |
| Pune            | 2021-02-14 ~2021-07-31 | 2021-05-14       | 1089386         | 484.6                | 4857275    |
| Mumbai          | 2021-02-11 ~2021-07-31 | 2021-04-17       | 734779          | 603.4                | 14744188   |
| Thane           | 2021-02-24 ~2021-07-31 | 2021-04-21       | 589018          | 147                  | 3581270    |

**Supplementary Table 3.** Statistics for selected cities in Brazil.

| City           | Time Period            | Behaviour Change | Confirmed Cases | Land Area ( $km^2$ ) | Population |
|----------------|------------------------|------------------|-----------------|----------------------|------------|
| São Paulo      | 2021-01-01 ~2021-07-31 | 2021-03-10       | 904083          | 1521                 | 17974819   |
| Brasilia       | 2021-01-01 ~2021-07-31 | 2021-02-23       | 450166          | 5802                 | 3611998    |
| Rio de Janeiro | 2021-01-01 ~2021-07-31 | 2021-04-26       | 398836          | 1255                 | 8015617    |
| Belo Horizonte | 2021-01-01 ~2021-07-31 | 2021-04-27       | 259535          | 330.9                | 3244199    |
| Fortaleza      | 2021-01-01 ~2021-07-31 | 2021-04-01       | 253811          | 313.8                | 3285519    |

**Supplementary Table 4.** Population of restricted regions in U.S. urban counties.

| City         | Total Population | Algorithm       | Controlled Population | Percentage |
|--------------|------------------|-----------------|-----------------------|------------|
| New York     | 8645904          | Random          | 415867                | 4.81%      |
|              |                  | Top Populated   | 422266                | 4.88%      |
|              |                  | Most Infectious | 416457                | 4.82%      |
| Cook         | 6880976          | Random          | 332365                | 4.83%      |
|              |                  | Top Populated   | 325095                | 4.72%      |
|              |                  | Most Infectious | 321007                | 4.67%      |
| Nassau       | 1627850          | Random          | 80892                 | 5.00%      |
|              |                  | Top Populated   | 80794                 | 4.96%      |
|              |                  | Most Infectious | 78782                 | 4.84%      |
| Suffolk      | 726471           | Random          | 84953                 | 5.02%      |
|              |                  | Top Populated   | 87807                 | 5.19%      |
|              |                  | Most Infectious | 84430                 | 4.99%      |
| Los Angeles  | 5941621          | Random          | 305118                | 5.14%      |
|              |                  | Top Populated   | 309545                | 5.21%      |
|              |                  | Most Infectious | 309550                | 5.21%      |
| Bergen       | 2199635          | Random          | 97258                 | 4.42%      |
|              |                  | Top Populated   | 97958                 | 4.45%      |
|              |                  | Most Infectious | 97878                 | 4.45%      |
| Hudson       | 707938           | Random          | 44248                 | 6.25%      |
|              |                  | Top Populated   | 41062                 | 5.80%      |
|              |                  | Most Infectious | 41064                 | 5.80%      |
| Philadelphia | 2158260          | Random          | 105545                | 4.89%      |
|              |                  | Top Populated   | 104777                | 4.85%      |
|              |                  | Most Infectious | 105076                | 4.87%      |
| Middlesex    | 3249380          | Random          | 139986                | 4.31%      |
|              |                  | Top Populated   | 141161                | 4.34%      |
|              |                  | Most Infectious | 141165                | 4.34%      |
| Union        | 116520           | Random          | 5728                  | 4.92%      |
|              |                  | Top Populated   | 7974                  | 6.84%      |
|              |                  | Most Infectious | 7977                  | 6.85%      |
| Miami-Dade   | 2788473          | Random          | 137034                | 4.91%      |
|              |                  | Top Populated   | 143188                | 5.13%      |
|              |                  | Most Infectious | 143190                | 5.14%      |
| New Haven    | 1160721          | Random          | 53958                 | 4.65%      |
|              |                  | Top Populated   | 55476                 | 4.78%      |
|              |                  | Most Infectious | 53062                 | 4.57%      |
| Oakland      | 1212662          | Random          | 59464                 | 4.90%      |
|              |                  | Top Populated   | 59046                 | 4.87%      |
|              |                  | Most Infectious | 59809                 | 4.93%      |
| New Orleans  | 354576           | Random          | 18170                 | 5.12%      |
|              |                  | Top Populated   | 18820                 | 5.31%      |
|              |                  | Most Infectious | 17823                 | 5.03%      |
| Ocean        | 584915           | Random          | 28652                 | 4.90%      |
|              |                  | Top Populated   | 29652                 | 5.07%      |
|              |                  | Most Infectious | 28349                 | 4.85%      |
| Harris       | 6099809          | Random          | 298287                | 4.89%      |
|              |                  | Top Populated   | 304437                | 4.99%      |
|              |                  | Most Infectious | 309631                | 5.08%      |
| King         | 2362968          | Random          | 118185                | 5.00%      |
|              |                  | Top Populated   | 115710                | 4.90%      |
|              |                  | Most Infectious | 115713                | 4.90%      |
| Davidson     | 931460           | Random          | 47858                 | 5.15%      |
|              |                  | Top Populated   | 47964                 | 5.15%      |
|              |                  | Most Infectious | 46693                 | 5.01%      |
| Will         | 1927804          | Random          | 94054                 | 4.88 %     |
|              |                  | Top Populated   | 97218                 | 5.04 %     |
|              |                  | Most Infectious | 95510                 | 4.95%      |
| Hillsborough | 1628413          | Random          | 80746                 | 4.96%      |
|              |                  | Top Populated   | 80131                 | 4.92%      |
|              |                  | Most Infectious | 84324                 | 5.18%      |

**Supplementary Table 5.** Population of restricted regions in Indian cities.

| City      | Total Population | Algorithm       | Controlled Population | Percentage |
|-----------|------------------|-----------------|-----------------------|------------|
| Delhi     | 23764826         | Random          | 2394590               | 10.08%     |
|           |                  | Top Populated   | 2388527               | 10.05%     |
|           |                  | Most Infectious | 2388592               | 10.05%     |
| Bengaluru | 14196185         | Random          | 1272813               | 8.97%      |
|           |                  | Top Populated   | 1296836               | 9.14%      |
|           |                  | Most Infectious | 1296837               | 9.14%      |
| Pune      | 4857275          | Random          | 489703                | 10.08%     |
|           |                  | Top Populated   | 492292                | 10.14%     |
|           |                  | Most Infectious | 492311                | 10.14%     |
| Mumbai    | 14744188         | Random          | 1475510               | 10.00%     |
|           |                  | Top Populated   | 1485880               | 10.08%     |
|           |                  | Most Infectious | 1485927               | 10.08%     |
| Thane     | 3581270          | Random          | 405313                | 11.32%     |
|           |                  | Top Populated   | 358563                | 10.01%     |
|           |                  | Most Infectious | 358569                | 10.01 %    |



**Supplementary Table 6.** Population of restricted regions in Brazilian cities.

| City           | Total Population | Algorithm       | Controlled Population | Percentage |
|----------------|------------------|-----------------|-----------------------|------------|
| São Paulo      | 17974819         | Random          | 1813335               | 10.09%     |
|                |                  | Top Populated   | 1813363               | 10.09%     |
|                |                  | Most Infectious | 1813429               | 10.09%     |
| Brasília       | 3611998          | Random          | 352588                | 9.76%      |
|                |                  | Top Populated   | 359142                | 9.94%      |
|                |                  | Most Infectious | 359151                | 9.94%      |
| Rio de Janeiro | 8015617          | Random          | 795824                | 9.93%      |
|                |                  | Top Populated   | 804380                | 10.04%     |
|                |                  | Most Infectious | 804406                | 10.04%     |
| Belo Horizonte | 3244199          | Random          | 327975                | 10.11%     |
|                |                  | Top Populated   | 327954                | 10.11 %    |
|                |                  | Most Infectious | 327986                | 10.11%     |
| Fortaleza      | 3285519          | Random          | 335223                | 10.20%     |
|                |                  | Top Populated   | 332139                | 10.11%     |
|                |                  | Most Infectious | 332154                | 10.11%     |

**Supplementary Table 7.** Parameters in our model.

| Name                                              | Description                                                                                                                                                                                                       | Value                                  | Source                             |
|---------------------------------------------------|-------------------------------------------------------------------------------------------------------------------------------------------------------------------------------------------------------------------|----------------------------------------|------------------------------------|
| Infection rate ( $\beta$ )                        | Probability of getting infected when a susceptible person collocates with an exposed or infected person. We assume the transmission probability is equal for exposed and infected people.                         | Learnable parameter                    | -                                  |
| Quarantine rate ( $\kappa$ )                      | The quarantine rate for the infected population.                                                                                                                                                                  | Learnable parameter                    | -                                  |
| Incubation period ( $\tau$ )                      | The average incubation period of exposed individuals.                                                                                                                                                             | 5.2                                    | Reference to <a href="#">10–12</a> |
| Recovery rate ( $\gamma$ )                        | The rate with which infected individuals recover or die.                                                                                                                                                          | 1/14                                   | According to <a href="#">13</a>    |
| Probability of symptomatic infection ( $\omega$ ) | The probability that a new infected person becomes symptomatic (I) Otherwise (s)he will become a asymptomatic patient (A), and the corresponding probability is $1 - \omega$ .                                    | 0.7                                    | Reference to <a href="#">12</a>    |
| Gravity model parameter $M, \rho, \theta, r$      | Scaling factor that represents the overall mobility; the attraction force of source neighborhood population and destination neighborhood population; the distance parameter for modeling the locality of mobility | Learnable parameter, 0.46, 0.64, 82 km | Reference to <a href="#">14,15</a> |

**Supplementary Table 8.** Average value of calibrated parameters in our model.

| City           | $\beta$               |                       | $\kappa$              |                       | $M$                   |                       |
|----------------|-----------------------|-----------------------|-----------------------|-----------------------|-----------------------|-----------------------|
|                | Phase 1               | Phase 2               | Phase 1               | Phase 2               | Phase 1               | Phase 2               |
| Bergen         | $2.86 \times 10^{-4}$ | $1.94 \times 10^{-4}$ | $5.32 \times 10^{-1}$ | $5.70 \times 10^{-1}$ | $8.87 \times 10^{-5}$ | $2.18 \times 10^{-5}$ |
| Cook           | $1.86 \times 10^{-4}$ | $9.70 \times 10^{-5}$ | $6.46 \times 10^{-1}$ | $5.12 \times 10^{-1}$ | $8.18 \times 10^{-5}$ | $2.97 \times 10^{-5}$ |
| Davidson       | $2.32 \times 10^{-4}$ | $2.64 \times 10^{-4}$ | $4.75 \times 10^{-1}$ | $4.72 \times 10^{-1}$ | $1.48 \times 10^{-4}$ | $8.08 \times 10^{-5}$ |
| Harris         | $3.11 \times 10^{-4}$ | $3.26 \times 10^{-4}$ | $7.80 \times 10^{-1}$ | $8.88 \times 10^{-1}$ | $1.54 \times 10^{-4}$ | $2.09 \times 10^{-4}$ |
| Hillsborough   | $1.12 \times 10^{-4}$ | $2.28 \times 10^{-4}$ | $4.13 \times 10^{-1}$ | $6.98 \times 10^{-1}$ | $1.30 \times 10^{-4}$ | $7.21 \times 10^{-5}$ |
| Hudson         | $2.13 \times 10^{-4}$ | $2.52 \times 10^{-4}$ | $5.35 \times 10^{-1}$ | $6.73 \times 10^{-1}$ | $1.57 \times 10^{-4}$ | $1.98 \times 10^{-4}$ |
| King           | $1.34 \times 10^{-3}$ | $7.25 \times 10^{-4}$ | $9.65 \times 10^{-1}$ | $9.13 \times 10^{-1}$ | $1.86 \times 10^{-4}$ | $6.22 \times 10^{-5}$ |
| Los Angeles    | $2.69 \times 10^{-4}$ | $3.89 \times 10^{-4}$ | $8.26 \times 10^{-1}$ | $8.39 \times 10^{-1}$ | $1.20 \times 10^{-4}$ | $6.93 \times 10^{-5}$ |
| Miami-Dade     | $1.52 \times 10^{-4}$ | $2.39 \times 10^{-4}$ | $5.65 \times 10^{-1}$ | $7.07 \times 10^{-1}$ | $1.25 \times 10^{-4}$ | $3.64 \times 10^{-5}$ |
| Middlesex      | $2.62 \times 10^{-4}$ | $2.55 \times 10^{-4}$ | $7.30 \times 10^{-1}$ | $7.54 \times 10^{-1}$ | $8.31 \times 10^{-5}$ | $2.32 \times 10^{-5}$ |
| New York City  | $5.16 \times 10^{-4}$ | $1.46 \times 10^{-4}$ | $8.73 \times 10^{-1}$ | $4.21 \times 10^{-1}$ | $4.02 \times 10^{-5}$ | $1.00 \times 10^{-5}$ |
| Nassau         | $3.98 \times 10^{-4}$ | $2.90 \times 10^{-4}$ | $5.20 \times 10^{-1}$ | $4.81 \times 10^{-1}$ | $4.20 \times 10^{-5}$ | $2.71 \times 10^{-5}$ |
| New Haven      | $6.57 \times 10^{-4}$ | $5.28 \times 10^{-3}$ | $6.40 \times 10^{-1}$ | $9.88 \times 10^{-1}$ | $1.57 \times 10^{-4}$ | $2.42 \times 10^{-4}$ |
| New Orleans    | $1.03 \times 10^{-3}$ | $2.14 \times 10^{-3}$ | $4.93 \times 10^{-1}$ | $7.33 \times 10^{-1}$ | $8.70 \times 10^{-5}$ | $1.14 \times 10^{-5}$ |
| Oakland        | $6.25 \times 10^{-4}$ | $3.73 \times 10^{-4}$ | $5.61 \times 10^{-1}$ | $5.00 \times 10^{-1}$ | $7.76 \times 10^{-5}$ | $2.94 \times 10^{-5}$ |
| Ocean          | $8.90 \times 10^{-4}$ | $5.08 \times 10^{-4}$ | $5.84 \times 10^{-1}$ | $5.08 \times 10^{-1}$ | $4.32 \times 10^{-5}$ | $1.00 \times 10^{-4}$ |
| Philadelphia   | $2.00 \times 10^{-4}$ | $4.04 \times 10^{-4}$ | $4.10 \times 10^{-1}$ | $6.60 \times 10^{-1}$ | $1.29 \times 10^{-4}$ | $3.71 \times 10^{-5}$ |
| Suffolk        | $4.63 \times 10^{-4}$ | $1.90 \times 10^{-4}$ | $6.44 \times 10^{-1}$ | $5.18 \times 10^{-1}$ | $9.08 \times 10^{-5}$ | $4.25 \times 10^{-5}$ |
| Union          | $4.91 \times 10^{-4}$ | $2.48 \times 10^{-4}$ | $4.17 \times 10^{-1}$ | $2.60 \times 10^{-1}$ | $1.91 \times 10^{-5}$ | $9.97 \times 10^{-5}$ |
| Will           | $2.38 \times 10^{-4}$ | $3.23 \times 10^{-4}$ | $5.45 \times 10^{-1}$ | $7.52 \times 10^{-1}$ | $1.48 \times 10^{-4}$ | $2.26 \times 10^{-4}$ |
| Bengaluru      | $2.90 \times 10^{-4}$ | $4.57 \times 10^{-4}$ | $9.02 \times 10^{-1}$ | $9.63 \times 10^{-1}$ | $1.13 \times 10^{-4}$ | $2.64 \times 10^{-5}$ |
| Delhi          | $4.86 \times 10^{-4}$ | $2.81 \times 10^{-4}$ | $9.36 \times 10^{-1}$ | $9.30 \times 10^{-1}$ | $2.21 \times 10^{-4}$ | $3.41 \times 10^{-5}$ |
| Mumbai         | $2.95 \times 10^{-4}$ | $3.49 \times 10^{-4}$ | $8.23 \times 10^{-1}$ | $8.92 \times 10^{-1}$ | $8.13 \times 10^{-5}$ | $1.33 \times 10^{-4}$ |
| Pune           | $4.47 \times 10^{-4}$ | $2.48 \times 10^{-4}$ | $8.69 \times 10^{-1}$ | $7.11 \times 10^{-1}$ | $2.81 \times 10^{-5}$ | $1.11 \times 10^{-4}$ |
| Thane          | $5.34 \times 10^{-4}$ | $3.18 \times 10^{-4}$ | $9.52 \times 10^{-1}$ | $8.83 \times 10^{-1}$ | $1.15 \times 10^{-4}$ | $8.00 \times 10^{-5}$ |
| Belo Horizonte | $5.58 \times 10^{-4}$ | $4.22 \times 10^{-4}$ | $8.21 \times 10^{-1}$ | $7.36 \times 10^{-1}$ | $8.55 \times 10^{-6}$ | $4.72 \times 10^{-6}$ |
| Brasilia       | $5.13 \times 10^{-4}$ | $1.68 \times 10^{-4}$ | $9.20 \times 10^{-1}$ | $7.65 \times 10^{-1}$ | $1.45 \times 10^{-5}$ | $8.85 \times 10^{-5}$ |
| Fortaleza      | $4.20 \times 10^{-4}$ | $4.22 \times 10^{-4}$ | $8.68 \times 10^{-1}$ | $8.36 \times 10^{-1}$ | $2.30 \times 10^{-5}$ | $5.34 \times 10^{-5}$ |
| Rio de Janeiro | $5.48 \times 10^{-4}$ | $4.04 \times 10^{-4}$ | $9.46 \times 10^{-1}$ | $9.19 \times 10^{-1}$ | $1.24 \times 10^{-4}$ | $1.70 \times 10^{-5}$ |
| São Paulo      | $5.35 \times 10^{-4}$ | $3.45 \times 10^{-4}$ | $9.48 \times 10^{-1}$ | $8.94 \times 10^{-1}$ | $1.23 \times 10^{-4}$ | $1.13 \times 10^{-5}$ |

## References

1. WorldPop, global high resolution population denominators project. <https://www.worldpop.org/> (2020).
2. Johns Hopkins University Center for Systems Science and Engineering. 2019 novel coronavirus COVID-19 (2019-nCoV) data repository by johns hopkins CSSE (2020). <https://github.com/CSSEGISandData/COVID-19> (2020).
3. COVID19India. Covid19india. <https://www.covid19india.org/> (2021).
4. Ministério da Saúde. Coronavírus brasil (in Portuguese). <https://covid.saude.gov.br/> (2021).
5. Department of Health & Human Services. Covid-19 state and county policy orders. <https://healthdata.gov/dataset/covid-19-state-and-county-policy-orders> (2020).
6. Bakker, M., Berke, A., Groh, M., Pentland, A. S. & Moro, E. Effect of social distancing measures in the new york city metropolitan area. *N. Engl. J. Public Policy* (2020).
7. Apple mobility trends reports. <https://www.apple.com/covid19/mobility> (2020).
8. NYC Department of Health and Mental Hygiene. NYC Health Data. <https://www1.nyc.gov/site/doh/covid/covid-19-data.page> (2021).
9. NYC Department of Health and Mental Hygiene. NYC Coronavirus Disease 2019 (COVID-19) Data. <https://github.com/nychealth/coronavirus-data> (2020).
10. Kraemer, M. U. *et al.* The effect of human mobility and control measures on the covid-19 epidemic in china. *Science* **368**, 493–497 (2020).
11. Wu, J. T., Leung, K. & Leung, G. M. Nowcasting and forecasting the potential domestic and international spread of the 2019-ncov outbreak originating in wuhan, china: a modelling study. *The Lancet* **395**, 689–697 (2020).
12. Ferretti, L. *et al.* Quantifying sars-cov-2 transmission suggests epidemic control with digital contact tracing. *Science* **368** (2020).
13. Bruce Aylward, W. L. Report of the WHO-China joint mission on coronavirus disease 2019 (COVID-19). <https://www.who.int/docs/default-source/coronaviruse/who-china-joint-mission-on-covid-19-final-report.pdf>.
14. Simini, F., González, M. C., Maritan, A. & Barabási, A.-L. A universal model for mobility and migration patterns. *Nature* **484**, 96–100 (2012).
15. Balcan, D. *et al.* Multiscale mobility networks and the spatial spreading of infectious diseases. *Proc. Natl. Acad. Sci. U. S. A.* **106**, 21484–21489 (2009).
